# Supplementary material
Source: PubMed Central journal article supplement (PMC4042070)
Supplement: me-14-1051.pdf [file me-14-1051.pdf]

1 **Supplemental Figures**

2 **Fig. S1 Selection of Motifs from ChIP-seq Datasets to Test KIKO Binding to HRE**

3 ChIP-seq datasets in the vicinity of uterine focus genes in Figs. 2 and 5-7 are displayed in UCSC Genome  
4 Browser showing WT and KIKO ER $\alpha$  (Blue), and PR (red) ChIP-seq tracks from mice treated for one  
5 hour with vehicle, E<sub>2</sub> or P<sub>4</sub>, and input tracks (blue). The arrow shows the HRE or ERE motif containing  
6 peak and the motif sequence that was inserted in pGL4.23 plasmid and tested in the *in vitro* DNA binding  
7 assay is shown. HRE or ERE motifs are indicated by bold text with consensus-matching nucleotides  
8 underlined.

9 A) *Ihh*

10 B) *Igf1*

11 C) *Aqp5* +2400 negative control

12 ChIP-seq near *Aqp5* showing selection of negative ChIP-PCR primers (region in oval)

13 ChIP-PCR using negative control primers

14

15 **Fig. S2 Control vectors demonstrate specificity of reporter gene assays**

16 WT, KIKO and EAAE ER $\alpha$  with empty pGL4.23-luc vector, EBNA-luc, *Igf1* NRE-luc, *Fkbp5* NRE-luc.

17 Fold changes relative to V are indicated above each bar. E<sub>2</sub> 10 nM, P<sub>4</sub> 100 nM. Note that PR induction of

18 empty pGL4.23 or EBNA-luc is similar to PR induction of *Igf1* ERE-luc (Fig. 5B), indicating the activity

19 may be mediated by a cryptic PR site in the vector. Statistics: 2-way ANOVA, multiple comparisons of

20 means vs. V, Bonferroni multiple test correction, \*p<0.05, \*\* p<0.001\*\*\*p<0.001, \*\*\*\* p<0.0001

21

22

1 **Fig. S3 Epstein Barr Virus Nuclear Antigen (EBNA) motif does not disrupt KIKO ER $\alpha$  HRE or**  
2 **ERE complex**

3 Since the NRE motif disrupted KIKO ER $\alpha$  complexes with HRE or ERE, to demonstrate the  
4 specificity of the DNA binding assay, 10x excess un-biotinylated EBNA motif was included in the  
5 binding reaction. Biotinylated *Fkbp5* HRE, *Ihh* HRE or *Igf1* ERE binding with nuclear protein  
6 extracts from WT or KIKO uteri. ER $\alpha$ -DNA complexes were detected as described in materials and  
7 methods. Non-biotinylated (unlabeled) DNA (Positive controls: *Fkbp5* HRE, *Ihh* HRE or *Igf1* ERE,  
8 Negative controls: *Fkbp5* NRE or *Igf1* NRE or EBNA; sequences in Table S1) was added to binding  
9 reactions at 10x higher levels to compete with biotinylated probes for ER $\alpha$  binding and demonstrate  
10 specificity. Probe, no NE sample contained no nuclear extract. Statistics: 2-way ANOVA, multiple  
11 comparisons of values to binding reactions without unlabeled competitor DNA (none), Bonferroni  
12 multiple test correction, \* P<0.05, \*\* P<0.01, \*\*\*P<0.001 \*\*\*\* p<0.0001.

13

14 **Fig. S4 EAAE ER $\alpha$  Mouse Uterus Lacks Transcriptional Responses to E<sub>2</sub>**

- 15 A. RT-PCR analysis of transcripts in WT and EAAE uterine samples treated for 2h with saline or  
16 E<sub>2</sub>. Transcripts that were E<sub>2</sub> responsive in the KIKO uterus (1) were selected for analysis in the  
17 EAAE uterus. Statistics: 2-way ANOVA, multiple comparisons of means vs. V, Bonferroni  
18 multiple test correction, \*p<0.05, \*\* p<0.001 \*\*\*P<0.001, \*\*\*\* p<0.0001.
- 19 B. Western blot of WT and EAAE uterine proteins probed with anti ER $\alpha$  and normalized to  $\beta$ -  
20 tubulin. ER $\alpha$ / $\beta$ Tub represents the ratio of the respective signal intensities.
- 21 C. EAAE differentially expressed uterine transcripts. Cluster showing 53 probes (representing 44  
22 genes) that were differentially expressed (FDR<0.05, fold change >2.0) in EAAE.
- 23 D. Hierarchical cluster comparing previous microarray data from KIKO (1) to EAAE.

1 As the older KIKO dataset and 2 WT datasets were done using a 2-color protocol (1), whereas the  
2 newer EAAE and 1 WT datasets were done using a one-color protocol (Materials and methods),  
3 to make this comparison, values are expressed as  $\log_{10}(\text{ratio } E_2 \text{ 2h/veh})$  and normalized to  
4 mean=0, SD=1.0. Cluster represents 7093 probes with at least 2-fold change (ratio >2.0 or <0.5),  
5 and filtered to remove probes with ratio=0 in the older dataset.

## 6 7 8 9 **References**

- 10  
11  
12  
13 **1.** Hewitt SC, O'Brien JE, Jameson JL, Kissling GE, Korach KS. Selective Disruption of ER alpha DNA-  
14 Binding Activity Alters Uterine Responsiveness to Estradiol. *Molecular Endocrinology*.  
15 2009;23(12):2111-2116.

Fig. S1A. *Ihh*

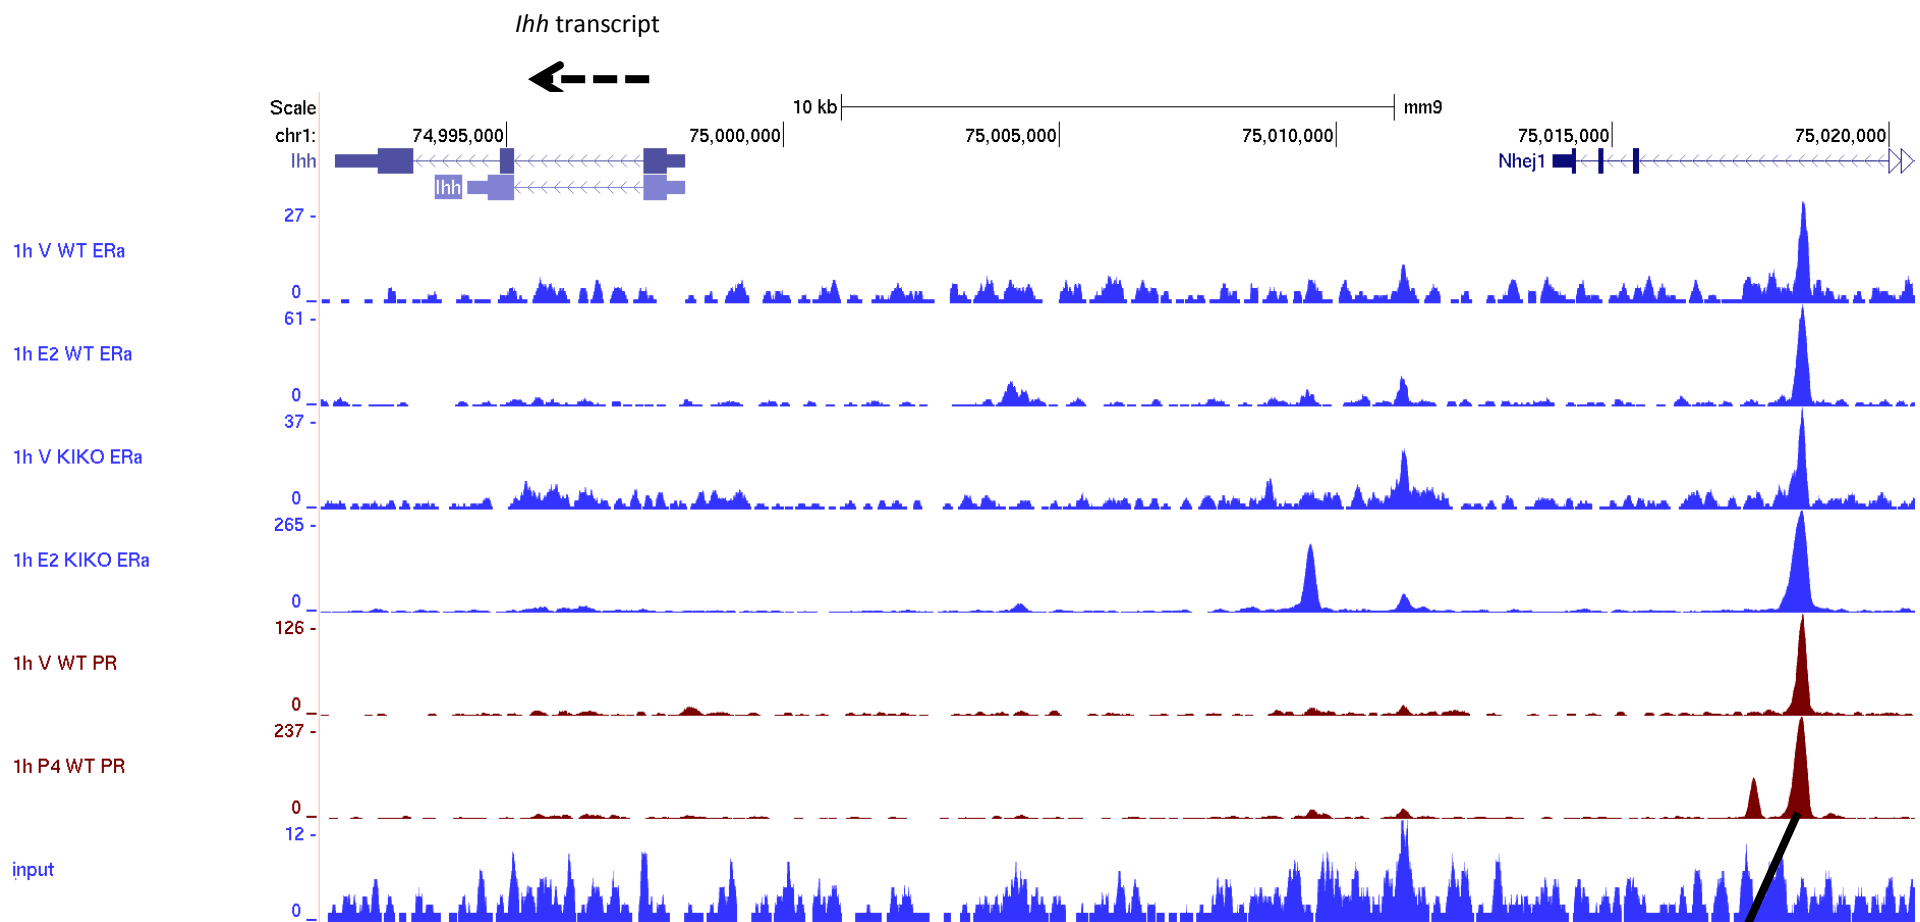

*Ihh* HRE: TACGGAAGGAACAGCATGAGCTCCCAGGG

Fig. S1B. *Igf1*

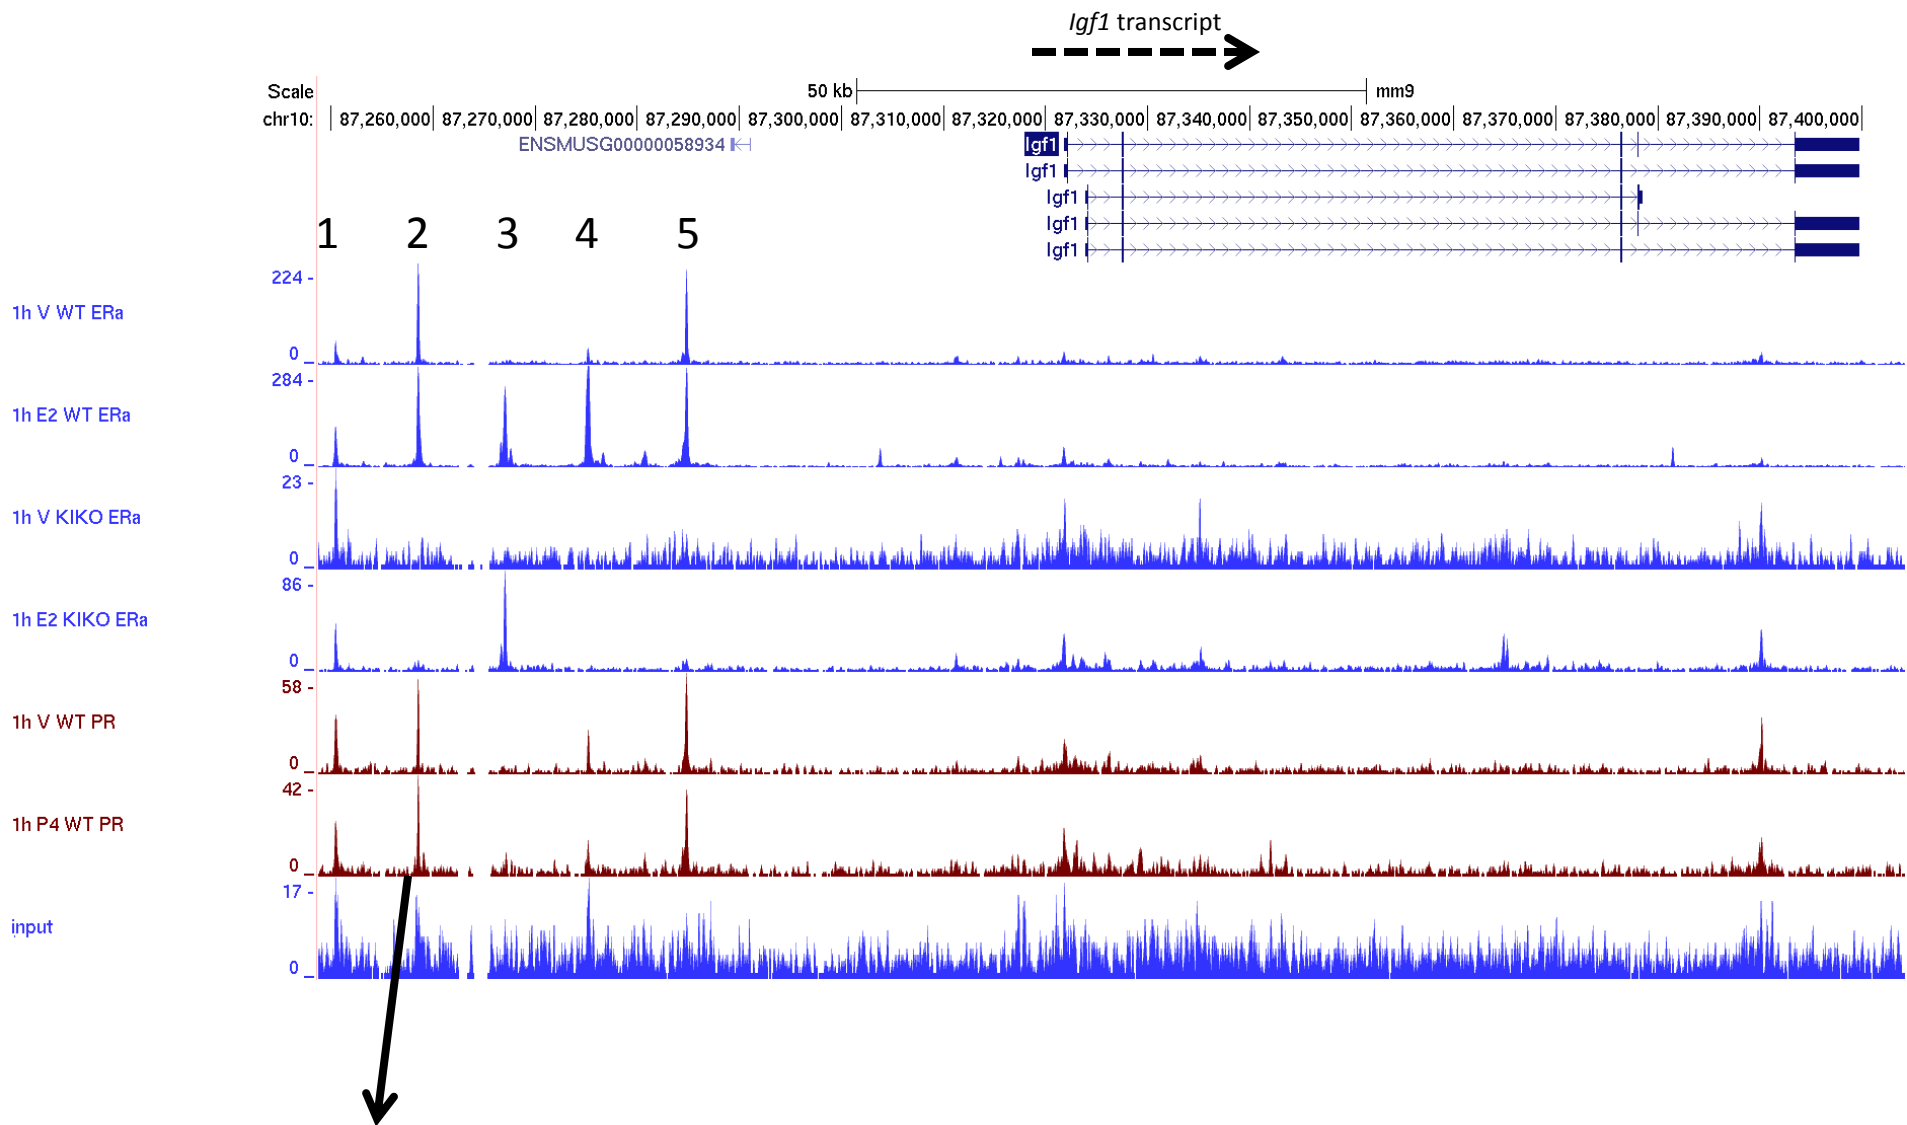

*Igf1* ERE:  
CTGGGCAAGGTCATGATGACCGCTGTATTT

Fig. S1C *Aqp5* +2400 (negative primers)

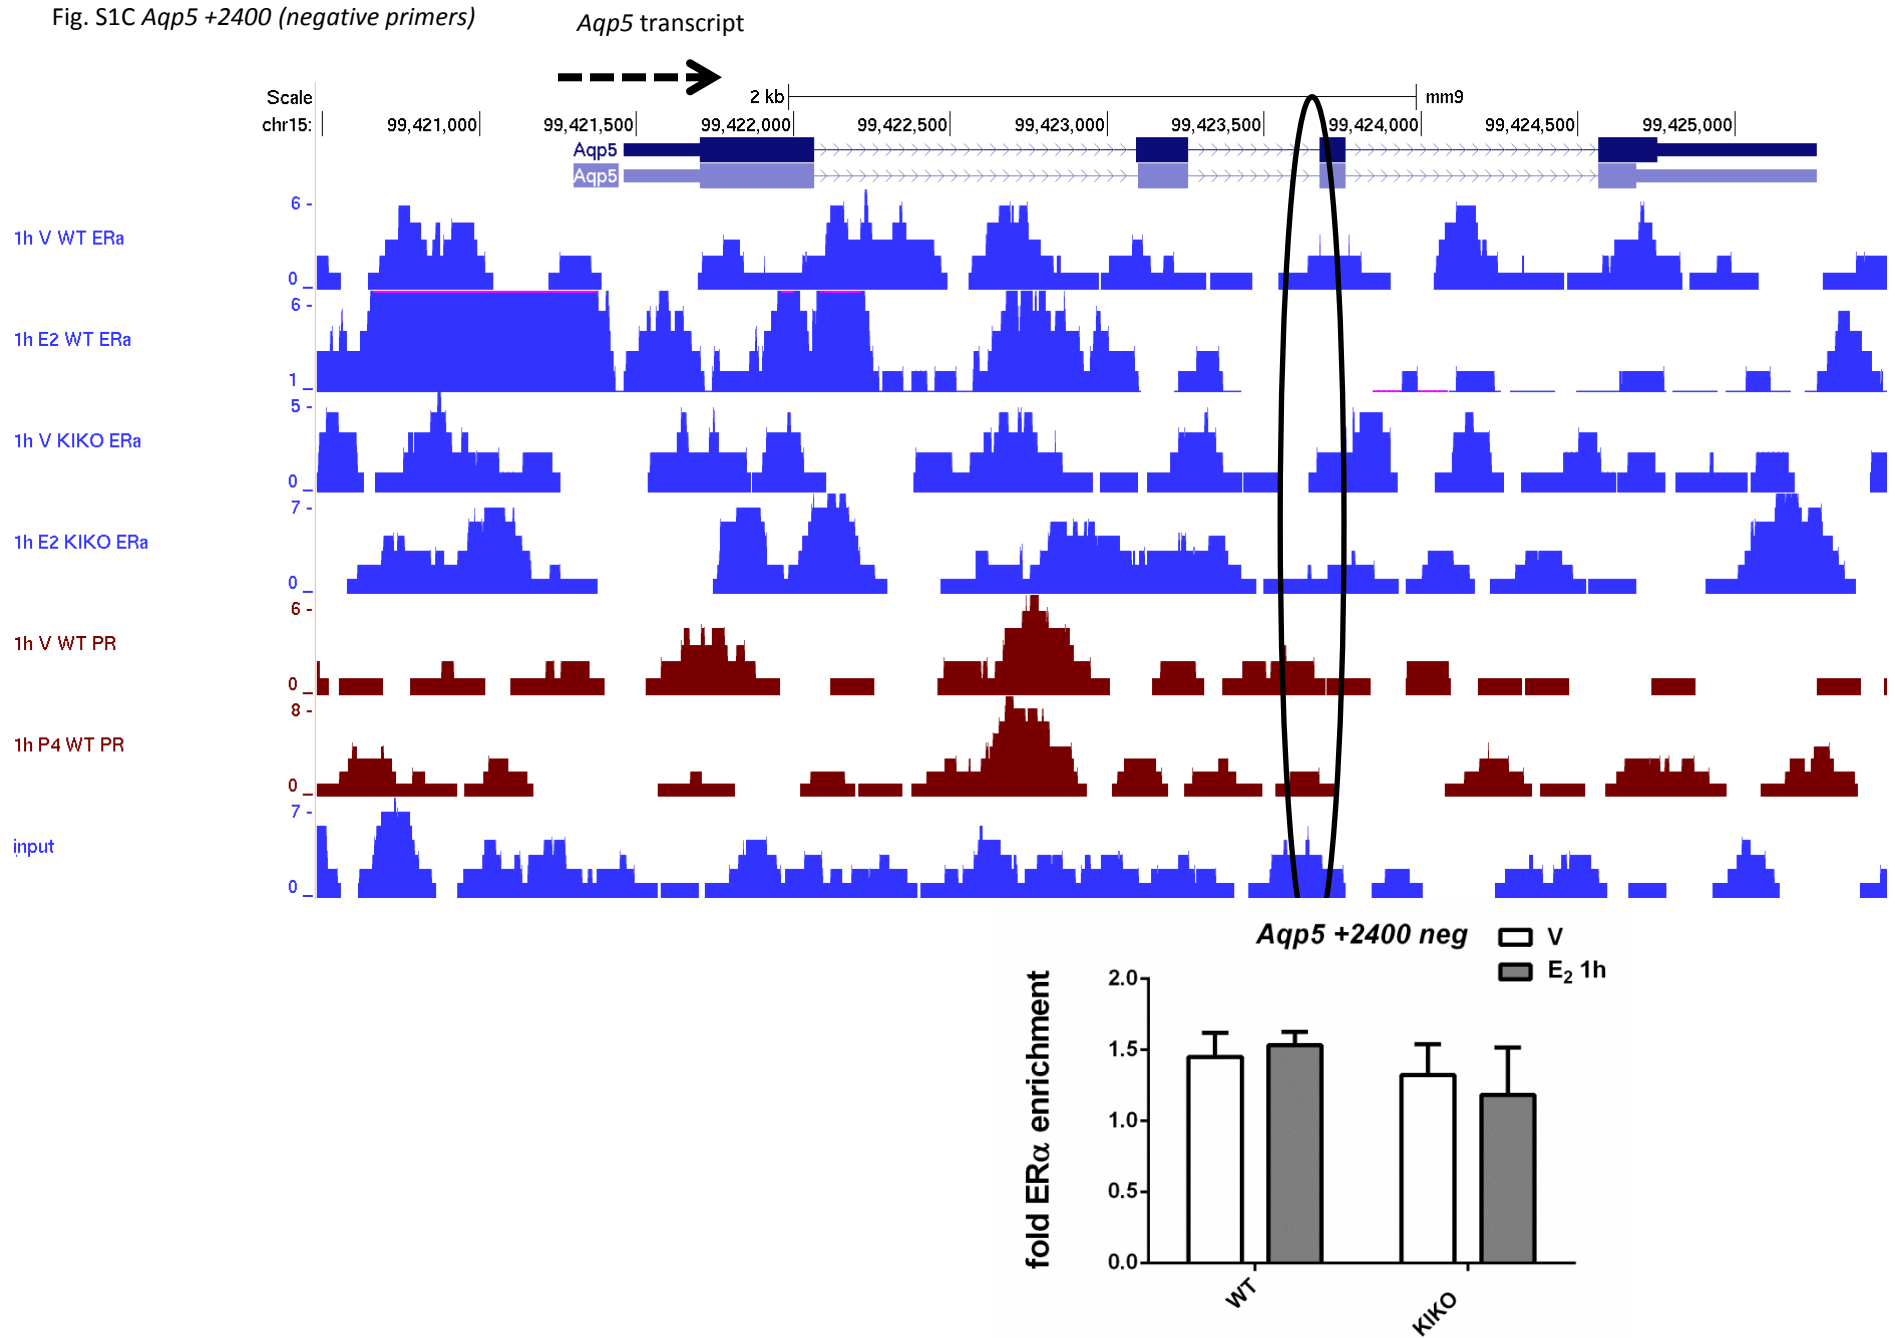

Fig. S2

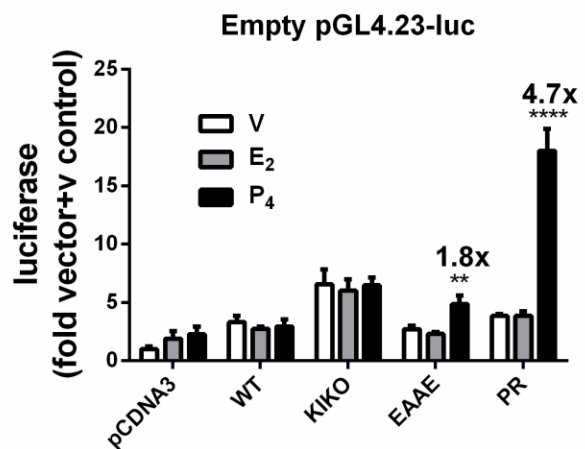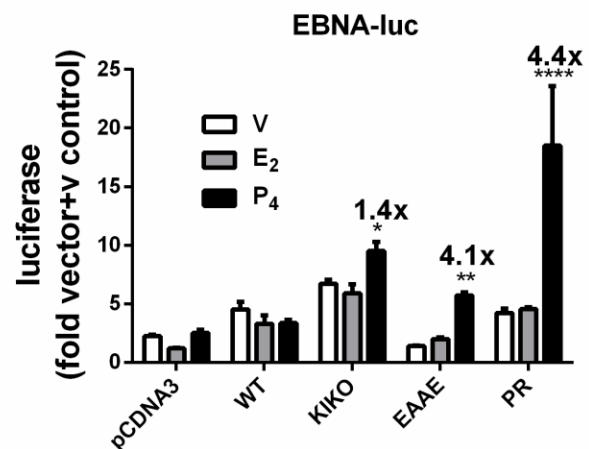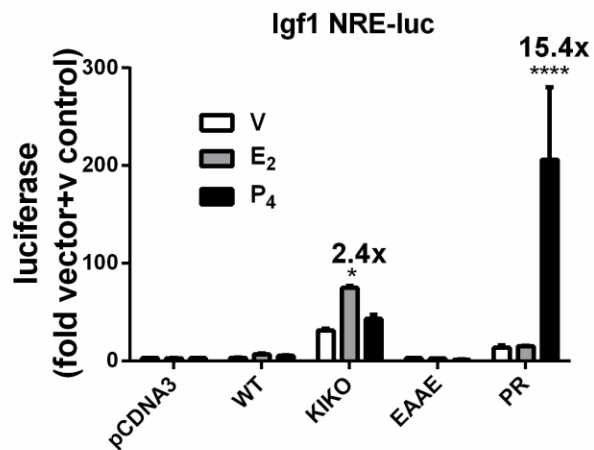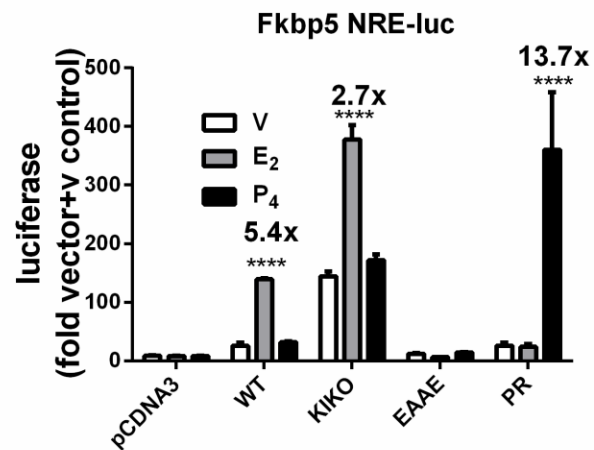

Fig. S3

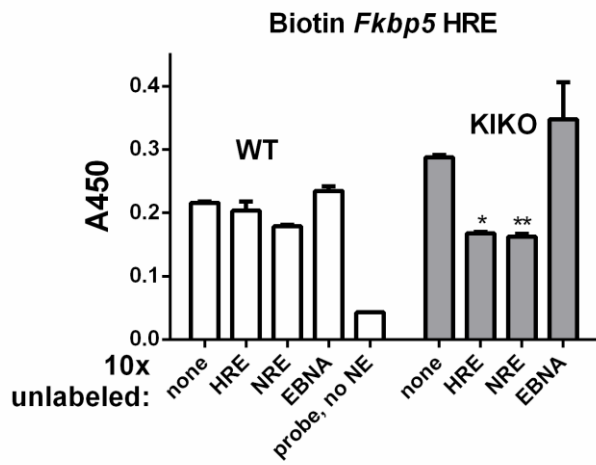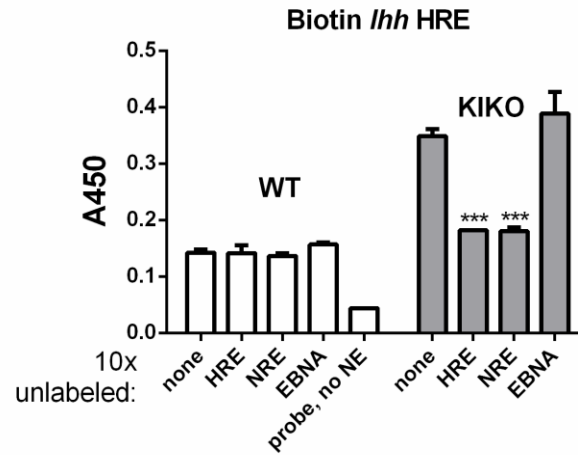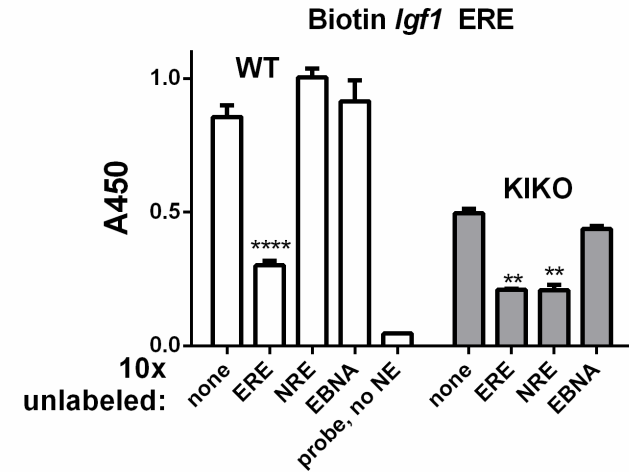



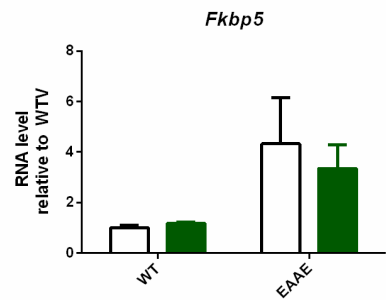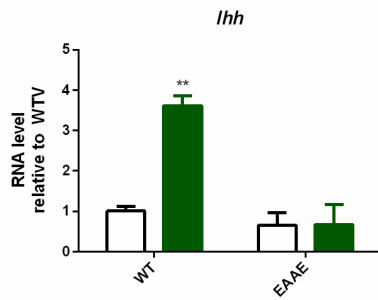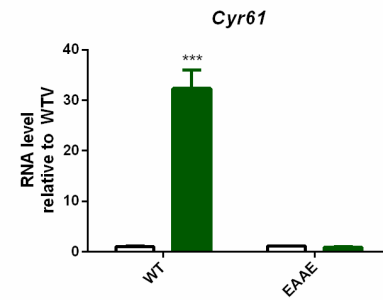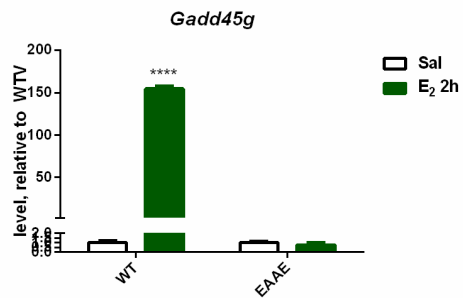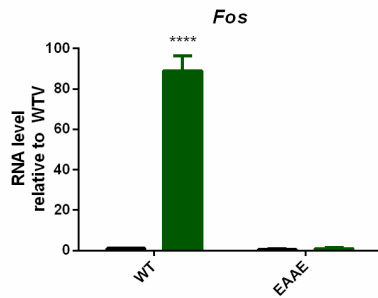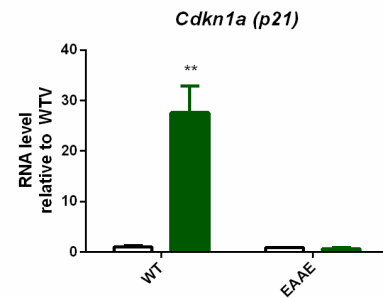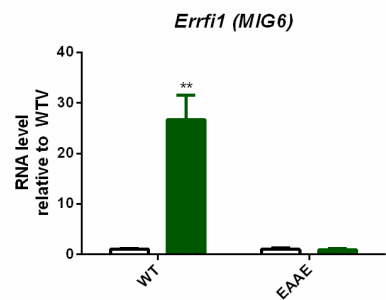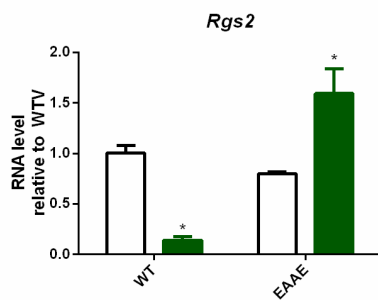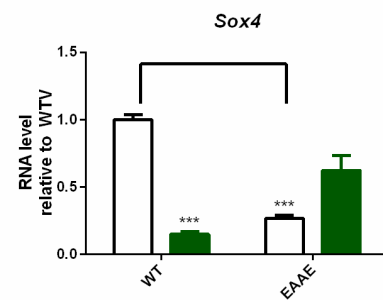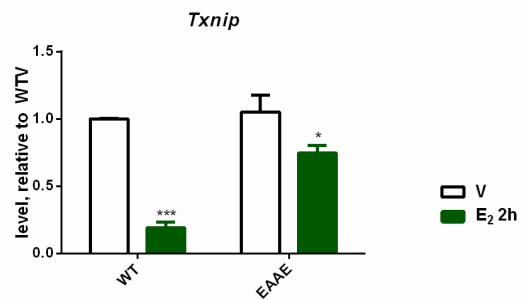

Fig. S4A

Fig S4B

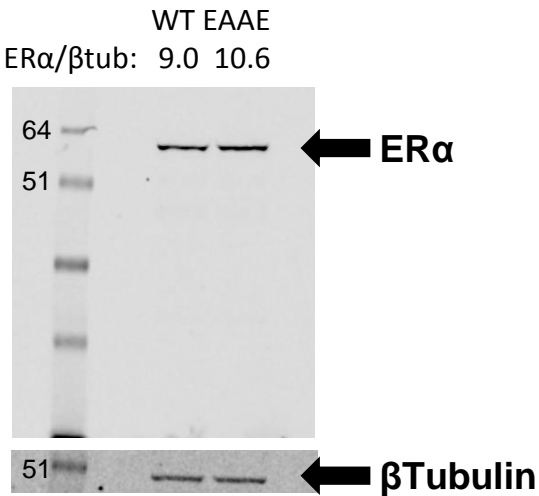

Fold Change (E<sub>2</sub> 2h/V)  
EAAE WT

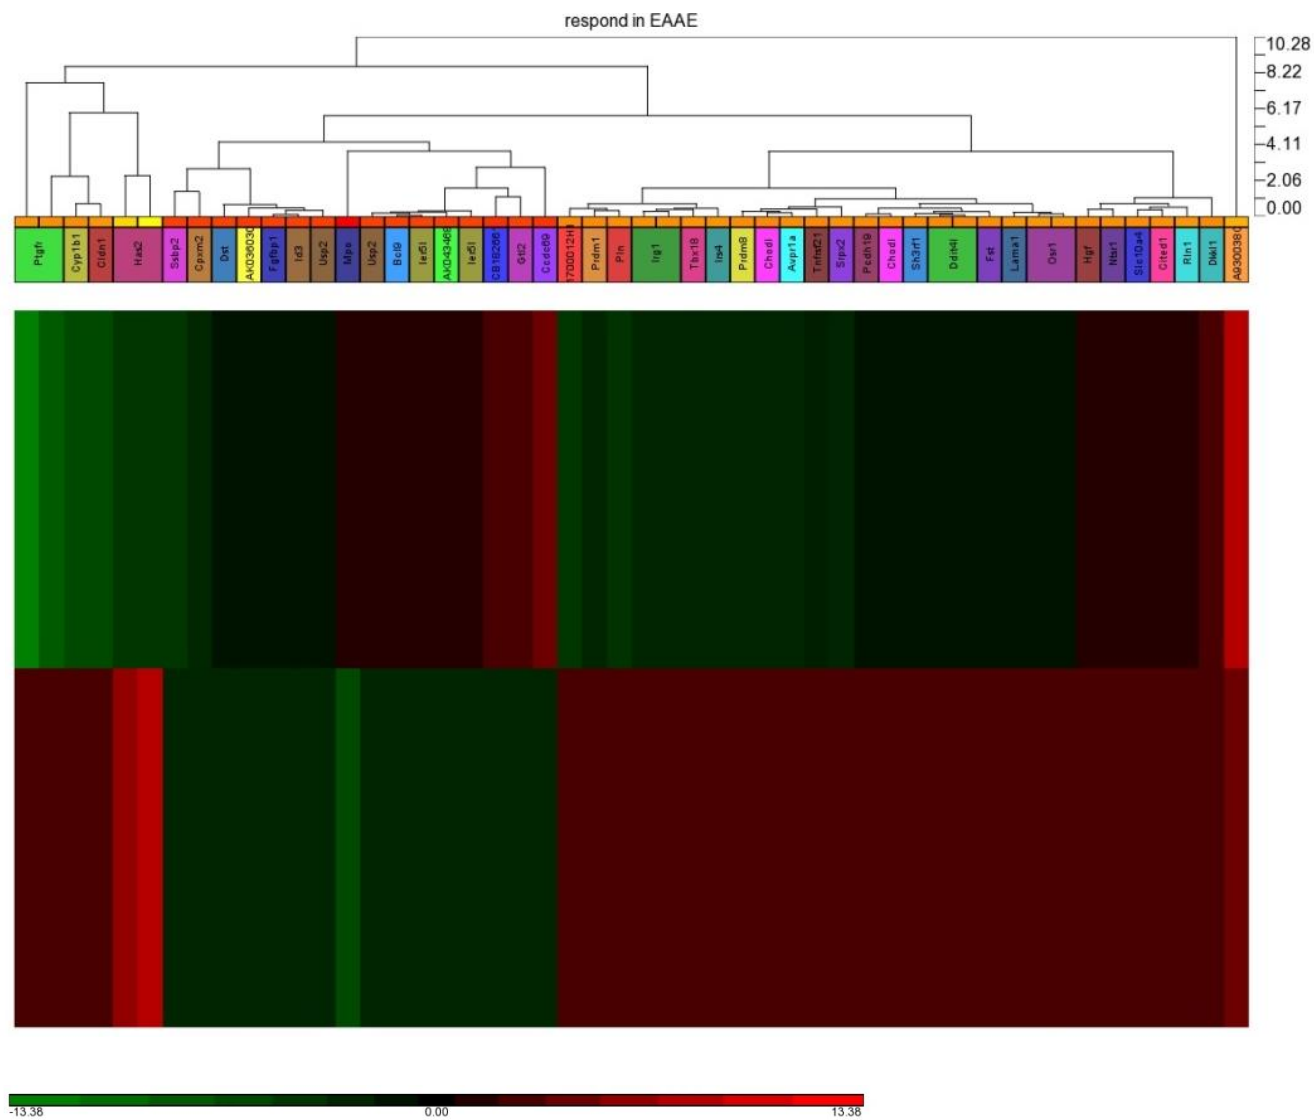

Fig S4C

Fig S4D

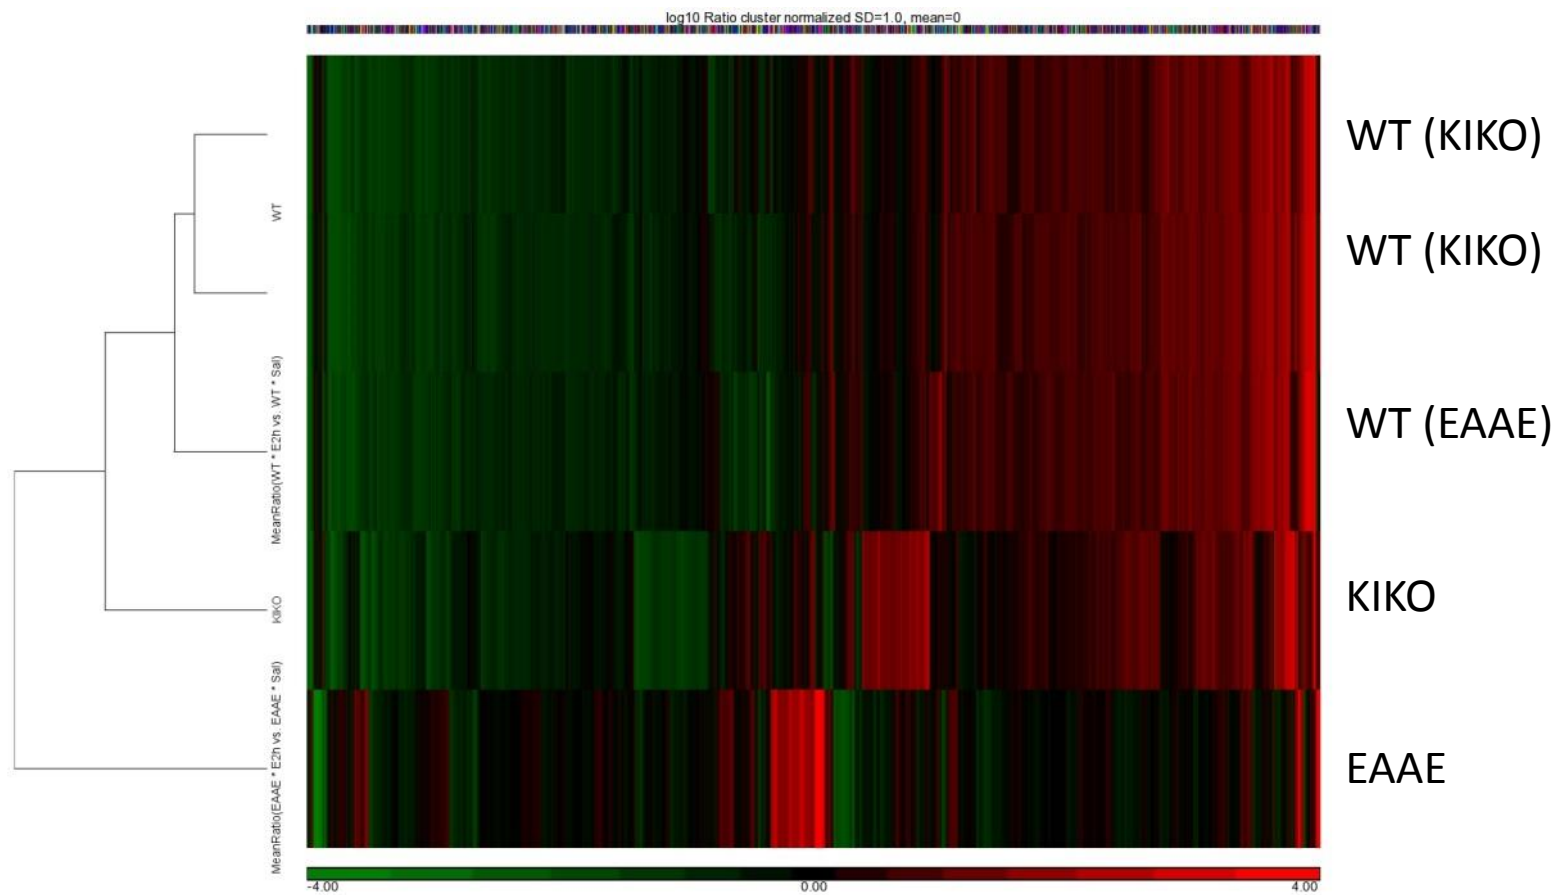

Table S1: Oligonucleotides used insert PREs in luciferase reporter, ChIP –PCR, RT-PCR and mutagenesis

|                                                       |                                  |
|-------------------------------------------------------|----------------------------------|
| <u>For Luciferase Reporter and DNA Binding Assay:</u> |                                  |
| Igf1 ERE+                                             | CTGGGCAAGGTCATGATGACCGCTGTATTT   |
| Igf1 ERE-                                             | AAATACAGCGGTCATCATGACCTTGCCCAG   |
| Ihh HRE+                                              | TACGGAAGGAACAGCATGAGCTCCCAGGG    |
| Ihh HRE-                                              | CCCTGGGAGCTCATGCTGTTCCCTCCGTA    |
| Fkbp5 HRE+                                            | GAAGAGCACAGAACACCCTGTTCTGAATGTGG |
| Fkbp5 HRE-                                            | CCACATTCAGAACAGGGTGTCTGTGCTCTTC  |
| Igf1 NRE+                                             | CTGGGCAAGATCATGATGATCGCTGTATTT   |
| Igf1 NRE-                                             | AAATACAGCGATCATCATGATCTTGCCCAG   |
| Fkbp5 NRE+                                            | GAAGAGCACAGATCACCTGATCTGAATGTGG  |
| Fkbp5 NRE-                                            | CCACATTCAGATCAGGGTGTCTGTGCTCTTC  |
| EBNA                                                  | ATCTGGGTAGCATATGCTATCCTAA        |
| <u>For ChIP-PCR:</u>                                  |                                  |
| Igf1 ERE F                                            | TTCCAGCCACCTCTCCACTTAC           |
| Igf1 ERE R                                            | CTGTGGAGCCATTGTTGGATCT           |
| Ihh HRE F                                             | GGGCAGCCACAGAGATCAA              |
| Ihh HRE R                                             | GCATACTTACAGCAGGAGACACTATTTACT   |
| Fkbp5 HRE F                                           | TCTGAATGTGGCTGGCACAT             |
| Fkbp5 HRE R                                           | GCTCCCCACCCCCATTT                |
| Klf15 HRE F                                           | TAACCATCTGGGAAGTGGCT             |

|                                         |                                                                   |
|-----------------------------------------|-------------------------------------------------------------------|
| Klf15 HRE R                             | GCCACTCTGGAACAGGATG                                               |
| Aqp5 +2400 neg F                        | CTCACCGTGACCCCCCTAT                                               |
| Aqp5 +2400 neg R                        | CGGGCTGGGTTCATGGA                                                 |
| <u>For RT-PCR</u>                       |                                                                   |
| Klf4 F                                  | GTGCCCCGACTAACCGTTG                                               |
| Klf4 R                                  | GTCGTTGAACTCCTCGGT                                                |
| Klf15 F                                 | GGAGTCCAGTCACCACAGG                                               |
| Klf15 R                                 | ATTTCCGGTGACGAGAAGG                                               |
|                                         |                                                                   |
| EAAE site directed mutagenesis primer 1 | GGGTCTGGTCCTGCGAAGGCTGCGCGGCTTTCTTTGCGGAGAGCATTCAAGGACACAATGACTAC |
| EAAE site directed mutagenesis primer 2 | AAGCCGCGCAGCCTTCGCAGGACCAGACCCCCTCATGGTAGCCAGAGGCATAGTCATTGC      |

Table S2 ChIP-seq data summary

|                            | ER                |                   |                   |                     |                   | PR                |                   |                   |
|----------------------------|-------------------|-------------------|-------------------|---------------------|-------------------|-------------------|-------------------|-------------------|
|                            | WT Veh            | WT E <sub>2</sub> | KIKO Veh          | KIKO E <sub>2</sub> | input             | PR Veh            | PR P <sub>4</sub> | input             |
| sequenced reads            | 61,593,532        | 32,117,033        | 51,125,666        | 48,508,817          | 57,614,948        | 35,628,904        | 35,585,795        | 44,458,968        |
| mapped reads               | 38,357,494        | 25,913,390        | 35,163,961        | 35,360,326          | 37,569,545        | 26,103,619        | 26,739,428        | 32,323,251        |
| mapped reads, deduplicated | <b>30,151,013</b> | <b>20,399,334</b> | <b>28,847,781</b> | <b>27,051,778</b>   | <b>34,039,058</b> | <b>17,991,984</b> | <b>19,973,075</b> | <b>30,611,636</b> |
| peaks                      | 5,496             | 20,792            | 2,908             | 18,990              | NA                | 3,541             | 12,590            | NA                |
| estimated fragment length  | 132               | 142               | 120               | 149                 | 120               | 138               | 140               | 100               |

Table S3: Motifs significantly enriched ( $p < 10^{-6}$ ) in 1h E<sub>2</sub> WT ER $\alpha$  selective vs. 1h E<sub>2</sub> WT ER $\alpha$ +1h E<sub>2</sub> KIKO ER $\alpha$  overlap. GGTC A motifs are highlighted.

| Model Name     | enrichment p-value |
|----------------|--------------------|
| ER_Q6 (ERE)    | 1.42E-307          |
| ER_Q6_02 (ERE) | 1.84E-117          |
| HNF4_Q6_02     | 1.22E-114          |
| PPARG_Q6       | 6.41E-113          |
| PPARG_02       | 6.50E-91           |
| FXR_Q2         | 7.98E-65           |
| RORA1_01       | 9.00E-61           |
| ERR1_Q2        | 3.15E-44           |
| ERR2_01        | 9.17E-42           |
| PPARA_Q6       | 1.70E-32           |
| RORA_Q4        | 2.61E-25           |
| ZNF333_01      | 2.28E-20           |
| TCF11_01       | 5.42E-20           |
| SF1_Q6_01      | 7.80E-18           |
| GCNF_01        | 6.34E-17           |
| DAX1_01        | 8.49E-17           |
| NUR77_Q5       | 3.74E-16           |
| RORA2_01       | 3.74E-13           |
| AREB6_01       | 4.77E-13           |
| AREB6_02       | 5.84E-13           |
| DELTAEF1_01    | 6.91E-11           |
| OG2_01         | 5.78E-10           |
| FOXP1_01       | 9.75E-10           |
| TITF1_Q3       | 3.20E-09           |
| PXRRXR_02      | 4.24E-09           |
| DRI1_01        | 4.43E-09           |
| SIX4_01        | 2.89E-08           |
| HMG1Y_Q3       | 5.59E-08           |
| SF1_Q6         | 4.05E-07           |
| NURR1_Q3       | 6.40E-07           |



**Table S4:** Motifs enriched in 1h E2 WT ER $\alpha$ +1h E2 KIKO ER $\alpha$  peaks vs. 1h E2 WT ER $\alpha$  selective peaks ( $p < 10^{-6}$ ). Includes potential tethering mediators. Previously described tethering factors are highlighted in blue. HRE motifs are highlighted in yellow.

| Model Name           | enrichment p-value |
|----------------------|--------------------|
| AHR_01               | 7.78E-10           |
| AHRARNT_02           | 1.86E-08           |
| AHRHIF_Q6            | 7.66E-10           |
| AP2_Q3               | 9.44E-37           |
| AP2_Q6               | 2.79E-36           |
| AP2_Q6_01            | 2.58E-39           |
| AP2ALPHA_01          | 1.45E-20           |
| AP2ALPHA_02          | 1.20E-08           |
| AP2GAMMA_01          | 4.47E-17           |
| AP4_01               | 3.74E-10           |
| AP4_Q5               | 3.04E-11           |
| AP4_Q6               | 2.16E-17           |
| AR_01                | 5.24E-39           |
| AR_02                | 1.11E-30           |
| AR_03                | 1.07E-37           |
| AR_04                | 6.98E-46           |
| ARNT_01              | 2.84E-07           |
| BEN_01               | 1.41E-13           |
| BEN_02               | 2.23E-09           |
| CACBINDINGPROTEIN_Q6 | 1.29E-11           |
| CACD_01              | 6.33E-12           |
| CEBP_Q2              | 2.59E-08           |
| CEBP_Q2_01           | 1.04E-07           |
| CEBPA_01             | 1.18E-09           |
| CEBPB_02             | 1.98E-09           |
| CETS1P54_01          | 1.91E-10           |
| CETS1P54_02          | 3.39E-14           |
| CETS1P54_03          | 1.52E-17           |
| CHCH_01              | 6.56E-27           |
| CKROX_Q2             | 6.49E-31           |
| CLOCKBMAL_Q6         | 1.00E-09           |
| CNOT3_01             | 4.63E-37           |
| CP2_02               | 4.74E-14           |
| CREB_Q3              | 8.55E-07           |
| CTCF_01              | 2.02E-17           |

|              |          |
|--------------|----------|
| CTCF_02      | 3.22E-11 |
| CTF1_01      | 3.15E-08 |
| DEAF1_01     | 1.02E-16 |
| DEAF1_02     | 9.87E-16 |
| E2F_02       | 2.64E-14 |
| E2F_Q2       | 1.47E-31 |
| E2F_Q3_01    | 2.23E-09 |
| E2F_Q4_01    | 3.30E-12 |
| E2F_Q6_01    | 1.03E-13 |
| E2F1_01      | 7.08E-09 |
| E2F1_Q3      | 1.50E-10 |
| E2F1_Q3_01   | 8.70E-20 |
| E2F1_Q4      | 6.65E-09 |
| E2F1_Q4_01   | 5.02E-09 |
| E2F1_Q6      | 3.60E-10 |
| E2F1_Q6_01   | 3.65E-12 |
| E47_01       | 1.37E-09 |
| EGR_Q6       | 1.34E-16 |
| EGR1_01      | 1.28E-15 |
| EGR2_01      | 2.58E-12 |
| EGR3_01      | 1.41E-13 |
| ELK1_01      | 7.14E-08 |
| ELK1_02      | 1.87E-23 |
| ELK1_04      | 1.65E-10 |
| ETF_Q6       | 1.36E-32 |
| ETS1_B       | 7.41E-08 |
| ETS2_Q6      | 4.78E-11 |
| FPM315_01    | 1.09E-34 |
| GABP_B       | 1.55E-17 |
| GABPALPHA_Q4 | 2.26E-22 |
| GADP_01      | 2.01E-15 |
| GKLF_02      | 1.58E-15 |
| GR_01        | 3.79E-29 |
| GR_Q6        | 1.44E-17 |
| HEB_Q6       | 1.85E-14 |
| HEN1_01      | 2.51E-14 |
| HEN1_02      | 3.95E-18 |
| HIC1_02      | 2.16E-20 |
| HIC1_03      | 8.65E-11 |
| HIF1_Q3      | 1.36E-11 |
| HIF1_Q5      | 2.08E-07 |

|            |          |
|------------|----------|
| IK_Q5      | 3.58E-16 |
| KID3_01    | 1.72E-07 |
| KROX_Q6    | 1.85E-38 |
| LBP1_Q6    | 2.62E-24 |
| LBP9_01    | 1.52E-10 |
| MAZ_Q6     | 4.23E-16 |
| MAZR_01    | 5.82E-13 |
| MEF2_02    | 9.40E-07 |
| MOVOB_01   | 6.30E-19 |
| MTF1_Q4    | 8.09E-13 |
| MYCMAX_03  | 4.31E-07 |
| MYCMAX_B   | 9.37E-12 |
| MYOD_Q6_01 | 5.00E-07 |
| MYOGNF1_01 | 9.82E-09 |
| MZF1_01    | 6.99E-07 |
| NERF_Q2    | 6.48E-11 |
| NEUROD_01  | 6.89E-10 |
| NEUROD_02  | 3.62E-15 |
| NF1_Q6     | 4.18E-30 |
| NF1_Q6_01  | 1.51E-19 |
| NGFIC_01   | 1.47E-17 |
| NRSF_01    | 1.31E-07 |
| NRSF_Q4    | 6.31E-12 |
| P300_01    | 9.86E-13 |
| P53_04     | 1.33E-09 |
| PAX4_01    | 3.14E-12 |
| PAX5_01    | 2.58E-08 |
| PR_01      | 3.39E-25 |
| PR_02      | 3.01E-28 |
| RBPJK_Q4   | 9.30E-07 |
| REST_01    | 6.08E-17 |
| RNF96_01   | 1.25E-24 |
| SAP1A_01   | 3.48E-18 |
| SP1_01     | 3.28E-09 |
| SP1_02     | 7.01E-21 |
| SP1_Q2_01  | 1.53E-26 |
| SP1_Q4_01  | 7.74E-25 |
| SP1_Q6     | 2.78E-25 |
| SP1_Q6_01  | 1.07E-23 |
| SP1SP3_Q4  | 2.25E-30 |
| SP3_Q3     | 3.39E-09 |

|                |          |
|----------------|----------|
| SP4_Q5         | 2.58E-24 |
| SPZ1_01        | 1.79E-12 |
| SREBP2_Q6      | 2.10E-08 |
| STAT1_01       | 3.83E-12 |
| STAT1_03       | 1.54E-08 |
| STAT1_05       | 1.95E-09 |
| STAT3_01       | 7.71E-09 |
| STAT3_02       | 1.74E-10 |
| STAT3_03       | 8.04E-18 |
| TAL1_Q6        | 1.33E-12 |
| TAL1ALPHA47_01 | 1.15E-08 |
| TFIIQ_Q6       | 2.13E-09 |
| USF_01         | 9.49E-07 |
| USF_Q6         | 7.91E-11 |
| WT1_Q6         | 8.42E-26 |
| ZBED6_01       | 3.22E-19 |
| ZBRK1_01       | 8.51E-10 |
| ZF5_01         | 3.53E-18 |
| ZF5_B          | 1.17E-11 |
| ZFP281_01      | 1.45E-16 |
| ZFX_01         | 1.30E-49 |
| ZNF219_01      | 1.22E-20 |

Table S5

WTWT and KIWT differ significantly in uterine weight from 7 weeks through 18 weeks.

Age-adjusted mean uterine weights, excluding animals  $\leq 4$  weeks

| Age (weeks) | Age-adjusted mean uterine weight (mg) $\pm$ s.e. |                 | KIWT vs. WTWT |
|-------------|--------------------------------------------------|-----------------|---------------|
|             | KIWT                                             | WTWT            | p-value       |
| 3           |                                                  |                 |               |
| 4           |                                                  |                 |               |
| 5           | 51.1 $\pm$ 9.0                                   | 67.7 $\pm$ 10.7 | 0.2388        |
| 6           | 73.5 $\pm$ 6.9                                   | 69.3 $\pm$ 8.6  | 0.7061        |
| 7           | 94.0 $\pm$ 5.6                                   | 70.6 $\pm$ 7.9  | 0.0170        |
| 8           | 112.7 $\pm$ 5.1                                  | 71.5 $\pm$ 8.2  | <0.0001       |
| 9           | 129.6 $\pm$ 5.4                                  | 72.2 $\pm$ 8.8  | <0.0001       |
| 10          | 144.7 $\pm$ 5.8                                  | 72.5 $\pm$ 9.2  | <0.0001       |
| 11          | 157.9 $\pm$ 6.3                                  | 72.5 $\pm$ 9.3  | <0.0001       |
| 12          | 169.3 $\pm$ 6.6                                  | 72.2 $\pm$ 9.0  | <0.0001       |
| 13          | 178.8 $\pm$ 6.7                                  | 71.6 $\pm$ 8.6  | <0.0001       |
| 14          | 186.5 $\pm$ 6.6                                  | 70.7 $\pm$ 8.4  | <0.0001       |
| 15          | 192.4 $\pm$ 6.4                                  | 69.4 $\pm$ 9.0  | <0.0001       |
| 16          | 196.4 $\pm$ 6.4                                  | 67.9 $\pm$ 11.0 | <0.0001       |
| 17          | 198.6 $\pm$ 6.7                                  | 66.0 $\pm$ 14.4 | <0.0001       |
| 18          | 199.0 $\pm$ 7.6                                  | 63.8 $\pm$ 19.0 | <0.0001       |

Uterine weights were measured in peri-pubertal KIWT females, revealing significant enlargement occurs beginning at 7 weeks of age, following the onset of exposure to cycling ovarian hormones at 4 weeks of age. Therefore, the abnormal uterine enlargement likely reflects the biological consequence of inappropriate estrogen-dependent transcriptional regulation mediated by the DBD mutation.

Table S6. Summary of DNA binding (DNA) and reporter gene (Luc) activity of motifs tested. KIKO RE shows nucleotides that exhibit activity with KIKO ER

|                  | 12345 | 54321  | DNA            |      | Luc |      |    |
|------------------|-------|--------|----------------|------|-----|------|----|
|                  |       |        | WT             | KIKO | WT  | KIKO |    |
| (ER) ERE:        | GGT   | CAnnn  | TGACC          |      |     |      |    |
| (PR, GR, AR)HRE: | GAAC  | Annn   | TGTTC          |      |     |      |    |
| KIKO RE:         | Gnn   | CAnnn  | TGnnC          |      |     |      |    |
| Fkbp5 HRE:       | GAAC  | ACCCT  | TGTTC          | -    | +   | +    | ++ |
| Fkbp5 NRE:       | GATC  | ACCCT  | TGATC          | -    | +   | +    | ++ |
| Igf1 ERE:        | GGT   | CATGAT | TGACC          | +    | +   | ++   | -  |
| Igf1 NRE:        | GATC  | CATGAT | TGATC          | -    | +   | -    | +  |
| Ihh HRE:         | GAAC  | AGCAT  | TGAGC          | -    | +   | -    | +  |
| EBNA:            | ATCT  | GGTAGC | ATATGCTATCCTAA | -    | -   | -    | -  |
